# Supplementary material for: Disparities in the Diagnosis and Treatment of Bile Duct Cancer in People with Disabilities: A National Cohort Study in South Korea
Source: MDPI journal article supplement (doi:10.3390/ijerph192416625), 2022-12-10
Supplement: s1 [file s1]

**Supplementary Table S1. Disability categories.**

| Category       | Type of disability                                                                                                   |
|----------------|----------------------------------------------------------------------------------------------------------------------|
| Physical       | amputation, motor disturbance, joint disability, disfigurements or deformities, spinal cord injury, facial, epilepsy |
| Brain          | brain impairment                                                                                                     |
| Communication  | sight, hearing or speech problems                                                                                    |
| Mental         | difficulty learning or understanding things, mental illness                                                          |
| Internal organ | functional impairment of internal organ diseases such as kidney, heart, liver, lung, intestine                       |

**Supplementary Table S2. Baseline characteristics of the target population.**

|               |                             | All cohort        | People without disabilities | People with disabilities | Severity        |                 |                   |                        | Type           |                 |                         |
|---------------|-----------------------------|-------------------|-----------------------------|--------------------------|-----------------|-----------------|-------------------|------------------------|----------------|-----------------|-------------------------|
|               |                             | N (%)             | N (%)                       | N (%)                    | Severe<br>N (%) | Mild<br>N (%)   | Physical<br>N (%) | Communication<br>N (%) | Brain<br>N (%) | Mental<br>N (%) | Internal organ<br>N (%) |
| <b>Age</b>    |                             | 11,105,800(100.0) | 8,329,350(75.0)             | 2,776,450(25.0)          | 1,091,794(39.3) | 1,684,656(60.7) | 1,436,219(51.7)   | 585,986 (21.1)         | 307,026 (11.1) | 307,720 (11.1)  | 139,499 (5.0)           |
|               | <65                         | 7,495,161(67.4)   | 5,638,970(67.7)             | 1,856,191(66.9)          | 785,173(71.9)   | 1,071,018(63.6) | 942,124 (65.6)    | 303,605 (51.8)         | 151,871 (49.5) | 294,498 (95.7)  | 89,911 (64.5)           |
|               | ≥65                         | 3,610,639(32.6)   | 2,690,380(32.3)             | 920,259(33.1)            | 306,621(28.1)   | 613,638(36.4)   | 494,095 (34.4)    | 282,381 (48.2)         | 155,155 (50.5) | 13,222 (4.3)    | 49,588 (35.5)           |
| <b>Sex</b>    | Male                        | 6,498,991(58.5)   | 4,874,242(58.5)             | 1,624,749(58.5)          | 653,958(59.9)   | 970,790(57.6)   | 837,697 (58.3)    | 340,738 (58.1)         | 176,904 (57.6) | 182,319 (59.2)  | 87,091 (62.4)           |
|               | Female                      | 4,606,809(41.5)   | 3,455,108(41.5)             | 1,151,701(41.5)          | 437,836(40.1)   | 713,866(42.4)   | 598,522 (41.7)    | 245,248 (41.9)         | 130,122 (42.4) | 125,401 (40.8)  | 52,408 (37.6)           |
| <b>Income</b> | Below poverty line (lowest) | 791,358(7.1)      | 323,466(3.9)                | 467,892(16.9)            | 306,705(28.1)   | 161,187(9.6)    | 175,603 (12.2)    | 75,881 (12.9)          | 52,792 (17.2)  | 140,984 (45.8)  | 22,630 (16.2)           |
|               | I                           | 2,281,035(20.5)   | 1,759,103(21.1)             | 521,932(18.8)            | 177,224(16.2)   | 344,708(20.5)   | 288,625 (20.1)    | 115,371 (19.7)         | 50,367 (16.4)  | 43,264 (14.1)   | 24,305 (17.4)           |
|               | II                          | 1,923,181(17.3)   | 1,459,618(17.5)             | 463,563(16.7)            | 157,095(14.4)   | 306,468(18.2)   | 258,990 (18.0)    | 101,167 (17.3)         | 46,185 (15.0)  | 35,045 (11.4)   | 22,176 (15.9)           |
|               | III                         | 2,505,208(22.6)   | 1,929,680(23.2)             | 575,528(20.7)            | 197,495(18.1)   | 378,033(22.4)   | 317,603 (22.1)    | 124,440 (21.2)         | 63,392 (20.6)  | 40,752 (13.2)   | 29,341 (21.0)           |
|               | IV (highest)                | 3,605,018(32.5)   | 2,857,483(34.3)             | 747,535(26.9)            | 253,275(23.2)   | 494,260(29.3)   | 395,398 (27.5)    | 169,126 (28.9)         | 94,288 (30.7)  | 47,675 (15.5)   | 41,047 (29.4)           |

|                             | N     | Duration | No. of death | rate per 1000 | Crude HR           | Adjusted HR 1      | Adjusted HR 2      |
|-----------------------------|-------|----------|--------------|---------------|--------------------|--------------------|--------------------|
| By disability               |       |          |              |               |                    |                    |                    |
| People without disabilities | 11372 | 18189.09 | 9524         | 523.61        | 1                  | 1                  | 1                  |
| People with disability      | 3693  | 5392.79  | 3176         | 588.934       | 1.097(1.054-1.142) | 1.083(1.040-1.128) | 1.074(1.031-1.119) |
| By disability grade         |       |          |              |               |                    |                    |                    |
| People without disabilities |       |          |              |               | 1                  | 1                  | 1                  |
| Grade 1-3                   | 1207  | 1472.29  | 1070         | 726.759       | 1.281 1.202 1.364  | 1.282(1.203-1.366) | 1.266(1.188-1.350) |
| Grade 4-6                   | 2486  | 3920.51  | 2106         | 537.175       | 1.023 0.976 1.073  | 1.005(0.958-1.053) | 0.999(0.953-1.047) |
| Grade 1                     | 174   | 169.87   | 158          | 930.113       | 1.569(1.340-1.836) | 1.629(1.392-1.907) | 1.648(1.407-1.930) |
| Grade 2                     | 470   | 541.42   | 420          | 775.741       | 1.324(1.201-1.460) | 1.318(1.195-1.454) | 1.309(1.186-1.444) |
| Grade 3                     | 563   | 761.00   | 492          | 646.517       | 1.178(1.076-1.289) | 1.174(1.072-1.286) | 1.151(1.051-1.261) |
| Grade 4                     | 716   | 1061.13  | 616          | 580.516       | 1.083(0.998-1.175) | 1.022(0.942-1.110) | 1.044(0.962-1.133) |
| Grade 5                     | 954   | 1593.81  | 794          | 498.177       | 0.970(0.902-1.043) | 0.948(0.882-1.020) | 0.954(0.887-1.026) |
| Grade 6                     | 816   | 1265.57  | 696          | 549.948       | 1.037(0.960-1.120) | 1.060(0.982-1.145) | 1.015(0.940-1.097) |
| By disability type          |       |          |              |               |                    |                    |                    |
| People without disabilities |       |          |              |               | 1                  | 1                  | 1                  |
| Physical                    |       |          |              |               |                    |                    |                    |
| Grade 1-3                   | 365   | 505.77   | 310          | 612.9         | 1.114(0.995-1.248) | 1.184(1.057-1.326) | 1.173(1.047-1.314) |
| Grade 4-6                   | 1588  | 2660.59  | 1317         | 495.0         | 0.951(0.898-1.008) | 0.963(0.909-1.02)  | 0.963(0.908-1.02)  |
| Communication               |       |          |              |               |                    |                    |                    |
| Grade 1-3                   | 298   | 352.02   | 267          | 758.48        | 1.305(1.155-1.474) | 1.182(1.046-1.335) | 1.180(1.045-1.333) |
| Grade 4-6                   | 748   | 1042.85  | 656          | 629.05        | 1.173(1.083-1.269) | 1.081(0.999-1.170) | 1.077(0.995-1.166) |
| Brain                       |       |          |              |               |                    |                    |                    |
| Grade 1-3                   | 336   | 346.74   | 309          | 491.14        | 1.536(1.371-1.720) | 1.474(1.315-1.652) | 1.502(1.340-1.684) |
| Grade 4-6                   | 133   | 183.54   | 118          | 642.93        | 1.204(1.004-1.444) | 1.139(0.949-1.367) | 1.032(0.859-1.238) |
| Mental                      |       |          |              |               |                    |                    |                    |

|                |     |        |     |        |                    |                    |                    |
|----------------|-----|--------|-----|--------|--------------------|--------------------|--------------------|
| Grade 1-3      | 72  | 88.74  | 64  | 721.16 | 1.273(0.996-1.628) | 1.655(1.293-2.118) | 1.653(1.289-2.122) |
| Grade 4-6      | -   | -      | -   |        | -                  | -                  | -                  |
| Internal organ |     |        |     |        |                    |                    |                    |
| Grade 1-3      | 136 | 179.01 | 120 | 670.37 | 1.184(0.989-1.418) | 1.221(1.019-1.463) | 1.100(0.917-1.318) |
| Grade 4-6      | 17  | 33.53  | 15  | 447.32 | 0.898(0.541-1.490) | 0.839(0.505-1.393) | 0.920(0.554-1.528) |

---

Adjusted HR 1: age, sex, Charlson comorbidity

Adjusted HR 2: 1+ income, endemic area, seer stage

|                             | N    | Duration | No. of death | rate per 1000 | Crude HR           | Adjusted HR 1      | Adjusted HR 2      |
|-----------------------------|------|----------|--------------|---------------|--------------------|--------------------|--------------------|
| By disability               |      |          |              |               |                    |                    |                    |
| People without disabilities | 7169 | 11593.37 | 5995         | 517.106       | 1                  | 1                  | 1                  |
| People with disability      | 2303 | 3328.22  | 1994         | 599.119       | 1.128(1.072-1.187) | 1.117(1.062-1.176) | 1.095(1.040-1.153) |
| By disability grade         |      |          |              |               |                    |                    |                    |
| People without disabilities |      |          |              |               | 1                  | 1                  | 1                  |
| Grade 1-3                   | 795  | 995.35   | 704          | 707.286       | 1.273(1.178-1.377) | 1.283(1.186-1.388) | 1.257(1.161-1.362) |
| Grade 4-6                   | 1508 | 2332.87  | 1290         | 552.968       | 1.062(1.000-1.128) | 1.045(0.984-1.110) | 1.025(0.965-1.089) |
| Grade 1                     | 106  | 108.54   | 94           | 866.028       | 1.535(1.252-1.882) | 1.598(1.303-1.960) | 1.606(1.308-1.971) |
| Grade 2                     | 299  | 340.01   | 268          | 788.217       | 1.370(1.212-1.548) | 1.382(1.222-1.562) | 1.357(1.199-1.537) |
| Grade 3                     | 390  | 546.81   | 342          | 625.451       | 1.155(1.036-1.288) | 1.156(1.036-1.289) | 1.128(1.011-1.259) |
| Grade 4                     | 399  | 575.77   | 351          | 609.614       | 1.153(1.035-1.284) | 1.109(0.996-1.235) | 1.138(1.022-1.268) |
| Grade 5                     | 558  | 896.54   | 466          | 519.774       | 1.015(0.924-1.116) | 0.983(0.895-1.081) | 0.984(0.895-1.082) |
| Grade 6                     | 551  | 860.55   | 473          | 549.649       | 1.049(0.955-1.152) | 1.065(0.970-1.170) | 0.993(0.904-1.091) |
| By disability type          |      |          |              |               |                    |                    |                    |
| People without disabilities |      |          |              |               | 1                  | 1                  | 1                  |
| Physical                    |      |          |              |               |                    |                    |                    |
| Grade 1-3                   | 256  | 361.46   | 219          | 605.873       | 1.113(0.973-1.274) | 1.211(1.058-1.387) | 1.18(1.03-1.352)   |
| Grade 4-6                   | 901  | 1444.73  | 758          | 524.667       | 1.008(0.935-1.088) | 1.038(0.963-1.12)  | 1.02(0.946-1.101)  |
| Communication               |      |          |              |               |                    |                    |                    |
| Grade 1-3                   | 175  | 208.57   | 157          | 752.73        | 1.313(1.120-1.538) | 1.158(0.988-1.357) | 1.182(1.008-1.386) |
| Grade 4-6                   | 489  | 706.33   | 429          | 607.37        | 1.158(1.050-1.277) | 1.063(0.964-1.173) | 1.057(0.958-1.166) |
| Brain                       |      |          |              |               |                    |                    |                    |
| Grade 1-3                   | 214  | 217.86   | 196          | 899.64        | 1.584(1.374-1.827) | 1.560(1.352-1.800) | 1.580(1.368-1.824) |
| Grade 4-6                   | 105  | 154.76   | 92           | 594.48        | 1.166(0.949-1.433) | 1.073(0.872-1.319) | 0.964(0.784-1.186) |
| Mental                      |      |          |              |               |                    |                    |                    |

Mental

|                |     |        |    |        |                    |                    |                    |
|----------------|-----|--------|----|--------|--------------------|--------------------|--------------------|
| Grade 1-3      | 44  | 59.89  | 38 | 634.55 | 1.199(0.872-1.650) | 1.539(1.118-2.120) | 1.482(1.071-2.051) |
| Grade 4-6      | -   | -      | -  | -      | -                  | -                  | -                  |
| Internal organ |     |        |    |        |                    |                    |                    |
| Grade 1-3      | 106 | 147.57 | 94 | 636.99 | 1.158(0.945-1.420) | 1.148(0.935-1.409) | 1.027(0.836-1.261) |
| Grade 4-6      | 13  | 27.06  | 11 | 406.54 | 0.832(0.461-1.504) | 0.728(0.403-1.317) | 0.777(0.430-1.407) |

---

Adjusted HR 1: age, sex, Charlson comorbidity

Adjusted HR 2: 1+ income, endemic area, seer stage

**Supplementary Table S3-3. Overall mortality in female patients diagnosed with bile duct cancer.**

|                             | N    | Duration | No. of death | rate per 1000 | Crude HR           | Adjusted HR 1      | Adjusted HR 2      |
|-----------------------------|------|----------|--------------|---------------|--------------------|--------------------|--------------------|
| By disability               |      |          |              |               |                    |                    |                    |
| People without disabilities | 4203 | 6595.73  | 3529         | 535.043       | 1                  | 1                  | 1                  |
| People with disability      | 1390 | 2064.58  | 1182         | 572.514       | 1.048(0.981-1.119) | 1.028(0.962-1.098) | 1.032(0.973-1.106) |
| By disability grade         |      |          |              |               |                    |                    |                    |
| People without disabilities |      |          |              |               |                    |                    |                    |
| Grade 1-3                   | 412  | 476.94   | 366          | 767.399       | 1.298(1.165-1.445) | 1.271(1.141-1.416) | 1.275(1.144-1.421) |
| Grade 4-6                   | 978  | 1587.64  | 816          | 513.970       | 0.964(0.893-1.040) | 0.947(0.877-1.022) | 0.954(0.884-1.030) |
| Grade 1                     | 68   | 61.33    | 64           | 1043.53       | 1.608(1.256-2.060) | 1.661(1.296-2.128) | 1.691(1.318-2.169) |
| Grade 2                     | 171  | 201.41   | 152          | 754.68        | 1.248(1.060-1.468) | 1.207(1.025-1.420) | 1.215(1.032-1.430) |
| Grade 3                     | 173  | 214.19   | 150          | 700.29        | 1.245(1.057-1.466) | 1.216(1.032-1.433) | 1.210(1.027-1.425) |
| Grade 4                     | 317  | 485.35   | 265          | 546.00        | 0.995(0.878-1.127) | 0.924(0.815-1.047) | 0.930(0.821-1.055) |
| Grade 5                     | 396  | 697.27   | 328          | 470.41        | 0.909(0.812-1.018) | 0.902(0.805-1.010) | 0.913(0.815-1.023) |
| Grade 6                     | 265  | 405.02   | 223          | 550.58        | 1.016(0.888-1.164) | 1.056(0.922-1.210) | 1.059(0.924-1.213) |
| By disability type          |      |          |              |               |                    |                    |                    |
| People without disabilities |      |          |              |               |                    |                    |                    |
| Physical                    |      |          |              |               |                    |                    |                    |
| Grade 1-3                   | 109  | 144.31   | 91           | 630.603       | 1.129(0.917-1.391) | 1.113(0.904-1.371) | 1.141(0.926-1.406) |
| Grade 4-6                   | 687  | 1215.87  | 559          | 459.754       | 0.879(0.804-0.961) | 0.875(0.800-0.957) | 0.888(0.811-0.971) |
| Communication               |      |          |              |               |                    |                    |                    |
| Grade 1-3                   | 123  | 143.45   | 110          | 766.836       | 1.289(1.066-1.559) | 1.217(1.006-1.471) | 1.184(0.979-1.433) |
| Grade 4-6                   | 259  | 336.52   | 227          | 674.547       | 1.205(1.053-1.378) | 1.125(0.983-1.287) | 1.120(0.979-1.282) |
| Brain                       |      |          |              |               |                    |                    |                    |
| Grade 1-3                   | 122  | 128.88   | 113          | 876.759       | 1.452(1.203-1.751) | 1.324(1.097-1.598) | 1.364(1.129-1.648) |
| Grade 4-6                   | 28   | 28.78    | 26           | 903.511       | 1.386(0.942-2.039) | 1.429(0.971-2.103) | 1.285(0.873-1.892) |
| Mental                      |      |          |              |               |                    |                    |                    |
| Grade 1-3                   | 28   | 28.86    | 26           | 900.865       | 1.391(0.945-2.046) | 1.899(1.288-2.799) | 1.951(1.320-2.882) |

|                |    |       |    |         |                    |                    |                    |
|----------------|----|-------|----|---------|--------------------|--------------------|--------------------|
| Grade 4-6      |    | -     | -  | -       | -                  | -                  | -                  |
| Internal organ |    |       |    |         |                    |                    |                    |
| Grade 1-3      | 30 | 31.44 | 26 | 827.025 | 1.326(0.901-1.950) | 1.577(1.071-2.323) | 1.456(0.988-2.146) |
| Grade 4-6      | 4  | 6.48  | 4  | 617.665 | 1.178(0.442-3.140) | 1.506(0.565-4.018) | 1.831(0.685-4.889) |

Adjusted HR 1: age, sex, Charlson comorbidity

Adjusted HR 2: 1+ income, endemic area, seer stage



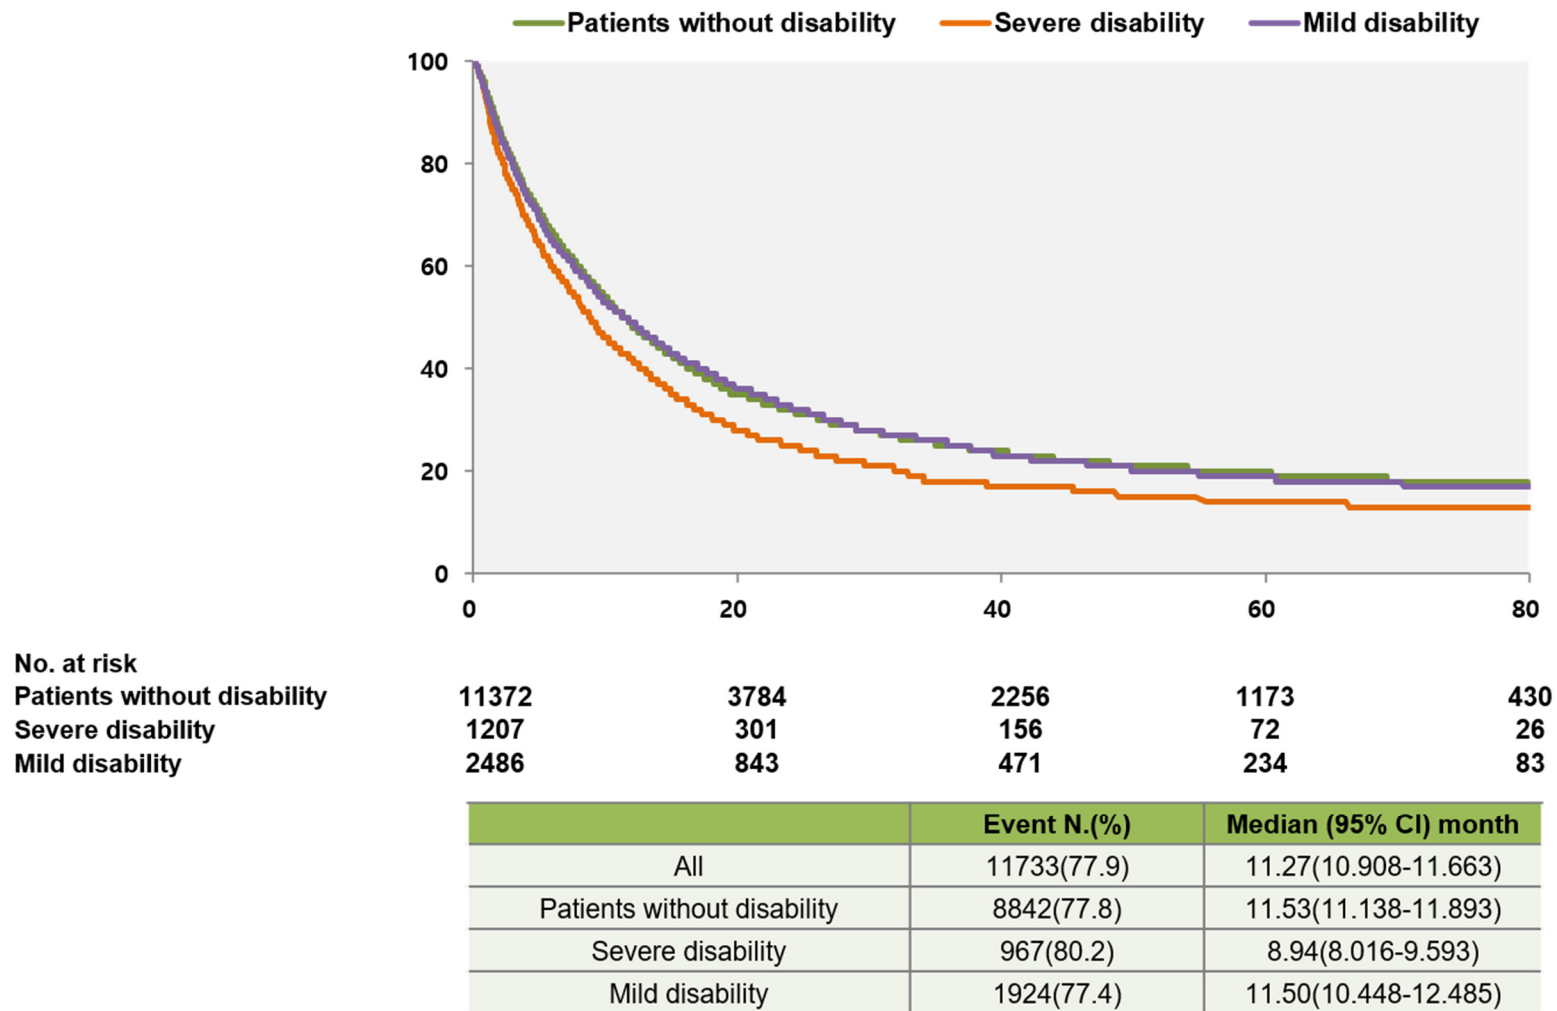

**Supplementary Figure S1. Comparison of cancer-specific survival by disability severity.**
